# Supplementary material for: Prognostic Value of PD-L1, PD-1 and CD8A in Canine Diffuse Large B-Cell Lymphoma Detected by RNAscope
Source: MDPI journal article supplement (doi:10.3390/vetsci8070120), 2021-06-29
Supplement: s1 [file s1]

**Table S2. Median TTP and survival analysis**

|                                | TTP (days)<br>(median; range) | p-value          |                   |                     | Hazard ratio (95% CI) |
|--------------------------------|-------------------------------|------------------|-------------------|---------------------|-----------------------|
|                                |                               | Log-rank<br>test | Cox<br>univariate | Cox<br>multivariate |                       |
| Breed                          |                               | 0.971            | 0.971             |                     |                       |
| Pure                           | 171; 1-1403                   |                  |                   |                     | 0.984 (0.420-2.307)   |
| Mixed                          | 69; 35-588                    |                  |                   |                     | ref                   |
| Sex                            |                               | <b>0.005</b>     | <b>0.025</b>      | 0.088               |                       |
| Female                         | 95; 35-1403                   |                  |                   |                     | 0.546 (0.250-1.195)   |
| Spayed female                  | 179; 34-325                   |                  |                   |                     | 0.761 (0.403-1.437)   |
| Male                           | 202; 1-988                    |                  |                   |                     | 0.501 (0.268-0.935)   |
| Neutered male                  | 24; 1-37                      |                  |                   |                     | ref                   |
| Age                            |                               | 0.367            | 0.371             |                     |                       |
| <7 years                       | 98; 1-1403                    |                  |                   |                     | 1.396 (0.672-2.901)   |
| ≥7 years                       | 171; 24-988                   |                  |                   |                     | Ref                   |
| Weight                         |                               | 0.715            | 0.717             |                     |                       |
| <10kg                          | 63; 1-455                     |                  |                   |                     | Ref                   |
| ≥10kg                          | 171; 1-1403                   |                  |                   |                     | 0.920 (0.585-1.447)   |
| Stage                          |                               | 0.661            | 0.667             |                     |                       |
| III                            | 78; 78-202                    |                  |                   |                     | 1.384 (0.314-6.094)   |
| IV                             | 60; 24-493                    |                  |                   |                     | 1.422 (0.636-3.182)   |
| V                              | 171; 1-1403                   |                  |                   |                     | ref                   |
| Sustage                        |                               | 0.090            | 0.099             | <b>0.004</b>        |                       |
| a                              | 180; 1-1403                   |                  |                   |                     | 0.703 (0.462-1.069)   |
| b                              | 69; 1-250                     |                  |                   |                     | ref                   |
| Bone marrow                    |                               | 0.679            | 0.681             |                     |                       |
| Infiltrated                    | 69; 1-588                     |                  |                   |                     | Ref                   |
| Not infiltrated                | 171; 1-1403                   |                  |                   |                     | 0.921 (0.622-1.363)   |
| Blood infiltration (%)         |                               |                  | 0.823             |                     | 0.997 (0.967-1.027)   |
| Bone marrow infiltration (%)   |                               |                  | 0.202             | 0.221               | 1.020 (0.989-1.052)   |
| CD8+ cells (flow cytometry, %) |                               |                  | 0.579             |                     | 1.028 (0.931-1.135)   |
| LDH activity                   |                               | 0.939            | 0.939             |                     |                       |
| Normal                         | 98; 1-988                     |                  |                   |                     | Ref                   |
| Increased                      | 179; 1-1403                   |                  |                   |                     | 1.014 (0.710-1.448)   |
| Pretreatment with steroids     |                               | 0.306            | 0.313             |                     |                       |
| Yes                            | 98; 1-325                     |                  |                   |                     | Ref                   |
| No                             | 171; 1-1403                   |                  |                   |                     | 0.813 (0.543-1.216)   |
| Treatment                      |                               | <b>0.001</b>     | <b>0.002</b>      | <b>0.001</b>        |                       |
| Chemo                          | 34; 1-455                     |                  |                   |                     | 1.848 (1.254-2.723)   |
| Chemoimmuno                    | 202; 35-1403                  |                  |                   |                     | Ref                   |
| Immunosignature                |                               | <b>0.024</b>     | <b>0.029</b>      | 0.905               |                       |
| Cold                           | 228; 32-988                   |                  |                   |                     | 0.662 (0.457-0.958)   |
| Hot                            | 60; 1-1403                    |                  |                   |                     | Ref                   |
| PD-L1 (RNAseq)                 |                               |                  | 0.961             |                     | 1.007 (0.749-1.355)   |
| PD1 (RNAseq)                   |                               |                  | <b>0.001</b>      | <b>0.005</b>        | 1.381 (1.138-1.676)   |
| CD8a (RNAseq)                  |                               |                  | 0.082             | 0.163               | 1.197 (0.977-1.467)   |
| PD-L1 (RNAcope)                |                               | <b>&lt;0.001</b> | <b>&lt;0.001</b>  | <b>0.002</b>        |                       |

|                 |    |              |              |                  |       |                      |
|-----------------|----|--------------|--------------|------------------|-------|----------------------|
|                 | 0  | 179          |              |                  |       | 0.389 (0.044-3.418)  |
|                 | 1  | 273; 180-988 |              |                  |       | 0.058 (0.013-0.250)  |
|                 | 2  | 202; 98-1403 |              |                  |       | 0.059 (0.011-0.306)  |
|                 | 3  | 35; 1-95     |              |                  |       | 1.879 (0.593-5.952)  |
|                 | 4  | 36; 1-196    |              |                  |       | Ref                  |
| PD1 (RNAscope)  |    |              | <b>0.010</b> | <b>0.019</b>     | 0.239 |                      |
|                 | 0  | 179; 20-493  |              |                  |       | 0.306 (0.097-0.964)  |
|                 | 1  | 288; 35-1403 |              |                  |       | 0.165 (0.051-0.534)  |
|                 | 2  | 69; 1-455    |              |                  |       | 0.555 (0.190-1.618)  |
|                 | 3  | 37; 1-196    |              |                  |       | Ref                  |
| CD8a (RNAscope) |    |              | 0.182        | 0.227            | 0.138 |                      |
|                 | 0  | 250; 250-273 |              |                  |       | 0.223 (0.028-1.761)  |
|                 | 1  | 98; 1-1403   |              |                  |       | 0.199 (0.036-1.095)  |
|                 | 2  | 196; 32-988  |              |                  |       | 0.271 (0.054-1.372)  |
|                 | 3  | 35; 1-455    |              |                  |       | 0.496 (0.100-2.464)  |
|                 | 4  | 36; 36-60    |              |                  |       | Ref                  |
| Ki67 (%)        |    |              |              | <b>&lt;0.001</b> | 0.877 | 1.037 (1.020-1.054)  |
| TILs            |    |              | 0.597        | 0.618            |       |                      |
|                 | 5  | 250; 1-1403  |              |                  |       | 0.721 (0.088-5.930)  |
|                 | 15 | 196; 20-493  |              |                  |       | 1.113 (0.128-9.671)  |
|                 | 25 | 95; 1-988    |              |                  |       | 1.326 (0.166-10.609) |
|                 | 40 | 36; 24-455   |              |                  |       | 1.608 (0.193-13.415) |
|                 | 50 | 202          |              |                  |       | Ref                  |

**Table S3. Median LSS and survival analysis**

|               | LSS (days)<br>(median; range) | p-value          |                   |                     | Hazard ratio (95% CI) |
|---------------|-------------------------------|------------------|-------------------|---------------------|-----------------------|
|               |                               | Log-rank<br>test | Cox<br>univariate | Cox<br>multivariate |                       |
| Breed         |                               | 1.000            | 1.000             |                     |                       |
| Pure          | 237; 22-1403                  |                  |                   |                     | 1.000 (0.421-2.377)   |
| Mixed         | 82; 50-989                    |                  |                   |                     | Ref                   |
| Sex           |                               | 0.066            | 0.096             | 0.058               |                       |
| Female        | 188; 50-1403                  |                  |                   |                     | 0.211 (0.047-0.949)   |
| Spayed female | 288; 41-645                   |                  |                   |                     | 0.390 (0.104-1.457)   |
| Male          | 544; 23-1153                  |                  |                   |                     | 0.196 (0.050-0.768)   |
| Neutered male | 28; 22-267                    |                  |                   |                     | Ref                   |
| Age           |                               | 0.577            | 0.578             |                     |                       |
| <7 years      | 237; 22-1403                  |                  |                   |                     | Ref                   |
| ≥7 years      | 228; 28-1153                  |                  |                   |                     | 1.234 (0.589-2.584)   |
| Weight        |                               | 0.760            | 0.760             |                     |                       |
| <10kg         | 82; 23-989                    |                  |                   |                     | Ref                   |
| ≥10kg         | 237; 22-1403                  |                  |                   |                     | 0.932 (0.593-1.464)   |
| Stage         |                               | 0.451            | 0.458             |                     |                       |
| III           | 87; 87-388                    |                  |                   |                     | 1.475 (0.331-6.565)   |
| IV            | 267; 28-585                   |                  |                   |                     | 1.699 (0.728-3.966)   |
| V             | 228; 22-1403                  |                  |                   |                     | Ref                   |
| Sustage       |                               | 0.313            | 0.317             |                     |                       |
| a             | 278; 22-1403                  |                  |                   |                     | 0.806 (0.529-1.299)   |
| b             | 188; 23-669                   |                  |                   |                     | Ref                   |

|                                               |                                                                         |                  |                  |              |                                                                                                    |
|-----------------------------------------------|-------------------------------------------------------------------------|------------------|------------------|--------------|----------------------------------------------------------------------------------------------------|
| Bone marrow<br>Infiltrated<br>Not infiltrated | 71; 22-767<br>237; 23-1403                                              | 0.812            | 0.812            |              | Ref<br>0.951 (0.629-1.437)                                                                         |
| Blood infiltration<br>(%)                     |                                                                         |                  | 0.617            |              | 0.993 (0.964-1.022)                                                                                |
| Bone marrow<br>infiltration (%)               |                                                                         |                  | 0.218            | 0.077        | 1.020 (0.988-1.054)                                                                                |
| CD8+ cells (flow<br>cytometry, %)             |                                                                         |                  | 0.437            |              | 1.039 (0.943-1.144)                                                                                |
| LDH activity<br>Normal<br>Increased           | 178; 23-1153<br>267; 22-1403                                            | 0.940            | 0.940            |              | Ref<br>1.014 (0.705-1.460)                                                                         |
| Pretreatment<br>with steroids<br>Yes<br>No    | 178; 23-669<br>267; 22-1403                                             | 0.350            | 0.353            |              | Ref<br>0.827 (0.553-1.235)                                                                         |
| Treatment<br>Chemo<br>Chemoimmuno             | 60; 22-989<br>330; 50-1403                                              | <b>0.002</b>     | <b>0.004</b>     | <b>0.022</b> | 1.776 (1.207-2.613)<br>Ref                                                                         |
| Immunosignature<br>Cold<br>Hot                | 544; 60-1153<br>87; 22-1403                                             | <b>0.010</b>     | <b>0.012</b>     | 0.710        | 0.615 (0.420-0.898)<br>Ref                                                                         |
| PD-L1 (RNAseq)                                |                                                                         |                  | 0.789            |              | 1.044 (0.762-1.430)                                                                                |
| PD1 (RNAseq)                                  |                                                                         |                  | <b>0.001</b>     | 0.182        | 1.356 (1.134-1.623)                                                                                |
| CD8a (RNAseq)                                 |                                                                         |                  | <b>0.035</b>     | 0.135        | 1.241 (1.015-1.517)                                                                                |
| PD-L1 (RNAscope)<br>0<br>1<br>2<br>3<br>4     | 228<br>544; 302-1153<br>645; 178-1403<br>71; 22-278<br>50; 23-237       | <b>&lt;0.001</b> | <b>0.002</b>     | <b>0.002</b> | 0.380 (0.044-3.270)<br>0.034 (0.006-0.191)<br>0.027 (0.004-0.195)<br>0.668 (0.235-1.901)<br>Ref    |
| PD1 (RNAscope)<br>0<br>1<br>2<br>3            | 228; 35-669<br>356; 63-1403<br>71; 22-989<br>82; 23-267                 | <b>0.026</b>     | <b>0.040</b>     | 0.076        | 0.340 (0.108-1.071)<br>0.191 (0.061-0.600)<br>0.459 (0.149-1.411)<br>Ref                           |
| CD8a (RNAscope)<br>0<br>1<br>2<br>3<br>4      | 302; 302-669<br>228; 22-1403<br>330; 60-1153<br>82; 23-989<br>50; 50-90 | 0.235            | 0.283            | 0.128        | 0.199 (0.026-1.549)<br>0.220 (0.041-1.173)<br>0.240 (0.048-1.210)<br>0.432 (0.088-2.128)<br>Ref    |
| Ki67 (%)                                      |                                                                         |                  | <b>&lt;0.001</b> | 0.102        | 1.047 (1.027-1.067)                                                                                |
| TILs<br>5<br>15<br>25<br>40<br>50             | 302; 22-1403<br>237; 35-585<br>188; 23-1153<br>94; 28-989<br>388        | 0.670            | 0.682            |              | 0.838 (0.102-6.878)<br>1.645 (0.190-14.219)<br>1.408 (0.174-11.430)<br>1.666 (0.200-13.865)<br>Ref |
